# Supplementary material for: Prevalence of chronic obstructive pulmonary disease at high altitude: a systematic review and meta-analysis
Source: PeerJ. 2020 Apr 3;8:e8586. doi: 10.7717/peerj.8586 (PMC7134014; doi:10.7717/peerj.8586)
Supplement: Supplemental Information 2 [file peerj-08-8586-s002.xlsx]

## Sheet: Sheet1
														High Altitude
Study	Year	Country(Period)	Type	Height Highland/Lowland(m)	BMI (kg/㎡）	Diagnostic Criteria	N	Male(%)	Age(yrs)	History of TB(%)	Current Smoking(%)	Higher education(%)	AHRQ	OR	95%CI
Evelyn A Brakema	2019	Netherlands	Cross-sectional	2050/750	26.0±5.17	Fixed ratio	392	187（47.7）	47.2±15.3	3(0.8)	106(27.0)	54(13.8)	7	3.406	1.483-7.825
Andre´s Caballero	2008	Colombian(2003.02~2004.05)	Cross-sectional	1538~2640/18~995	NA	Fixed ratio	5539	1838（33.2）	≥40	NA	1014(18.3)	NA	8	2.13/1.39	1.55-2.94/0.98-1.96
Ana Maria B Menezes	2005	America	Cross-sectional	2240/35~950	NA	Fixed ratio	5315	999（18.8）	≥40	NA	907(17.1)	579(10.9)	10	0.45	0.35-0.58
Rafael Laniado-Laborin	2012	Mexico(2008.03~2008.10)	Cross-sectional	＞2000/0~10	28.3±4.82	Fixed ratio	2293	NA	55.3±21.7	NA	NA	NA	6	1.1	1.0-1.3
Andreas Horner	2017	Austria(2003~2012)	Cross-sectional	＞1500/≤1500	NA	LLN	30874	13644(44.2)	56.1±11.3	957(3.1)	7065(22.9)	6725(21.8)	8	0.9	0.80-1.02
Catherine H Miele	2018	Peru(2010.09~?)	Cross-sectional	3825/0~500	27.7±4.6	Fixed ratio	3048	1499（49.2）	55.4±12.5	89(3.0)	101(3.3)	NA	8	1.82	1.3-2.55
Devan Jaganath	2015	Peru(2010.09~?)	Cross-sectional	3825/0~500	NA	Fixed ratio	2957	1457（49.3）	45.2±14.2	86(2.9)	97(3.3)	NA	9	1.61	0.92-2.82
Denis Vinnikov	2011	Kyrgyzstan（2005~2009）	Cross-sectional	3800~4500	NA	Fixed ratio	842	737 (87.5)	38.9±8.6	NA	449（53.3）	NA	7	81（9.6%）
S. Zaeh	2016	Peru(2010.09~?)	Cross-sectional	3825/0~500	27.8±4.6	Fixed ratio	2953	1447（ 49.0）	55.3±12.4	NA	NA	635（21.5）	8	81（8.0%）
Diego Urrunaga-Pastor	2018	Peru(2013~2016)	Cross-sectional	2158~3847	NA	Patient-reported	365	123(33.7)	≥60	NA	NA	2（0.6）	5	14（3.8）
Study	Year	or	Lor	Uor	subgroup
Evelyn A Brakema	2019	3.406	1.483	7.825	Asia
Andre´s Caballero	2008	1.39	0.98	1.96	America
Ana Maria B Menezes	2005	0.45	0.35	0.58	America
Rafael Laniado-Laborin	2012	1.1	1	1.3	America
Andreas Horner	2017	0.9	0.8	1.02	Europe
Catherine H Miele	2018	1.82	1.3	2.55	America
Devan Jaganath	2015	1.61	0.92	2.82	America

## Sheet: Sheet2
Study	Year	event1	noevent1	event2	noevent2
Evelyn A Brakema	2019	73	126	20	173
Andre´s Caballero	2008	246	1988	248	3057
Ana Maria B Menezes	2005	78	922	681	3634
Rafael Laniado-Laborin	2012	108	583	364	1238
Andreas Horner	2017	338	3640	2663	24233
Catherine H Miele	2018	69	975	75	1929
Devan Jaganath	2015	81	932	96	1848
Study	Year	groupevent	grouptotal	sub		Study	Year	groupevent	grouptotal	Gender
Denis Vinnikov	2011	81	842	Asia		Denis Vinnikov	2011			Male
S. Zaeh	2016	81	1012	America		S. Zaeh	2016			Male
Evelyn A Brakema	2019	73	199	Asia		Evelyn A Brakema	2019			Male
Andre´s Caballero	2008	246	2234	America		Andre´s Caballero	2008			Male
Ana Maria B Menezes	2005	78	1000	America		Ana Maria B Menezes	2005			Male
Rafael Laniado-Laborin	2012	108	691	America		Rafael Laniado-Laborin	2012			Male
Andreas Horner	2017	338	3978	Europe		Andreas Horner	2017			Male
Catherine H Miele	2018	69	1044	America		Catherine H Miele	2018			Male
Devan Jaganath	2015	81	1013	America		Devan Jaganath	2015			Male
Diego Urrunaga-Pastor	2018	14	365	America		Diego Urrunaga-Pastor	2018			Male
						Denis Vinnikov	2011			Female
						S. Zaeh	2016			Female
						Evelyn A Brakema	2019			Female
						Andre´s Caballero	2008			Female
						Ana Maria B Menezes	2005			Female
						Rafael Laniado-Laborin	2012			Female
						Andreas Horner	2017			Female
						Catherine H Miele	2018			Female
						Devan Jaganath	2015			Female
						Diego Urrunaga-Pastor	2018			Female
